# Supplementary material for: Emergence of Phytobacter diazotrophicus carrying an IncA/C2 plasmid harboring blaNDM-1 in Tokyo, Japan
Source: PubMed Central journal article supplement (PMC10449528; doi:10.1128/msphere.00147-23), 2023-07-14
Supplement: msphere.00147-23-s0001.pdf [file msphere.00147-23-s0001.pdf]

**Table S1. BLAST hit results on partial 16S rRNA sequence. \***

| Identity % | Species                           | Strain    | Identical bases | Accession No. |
|------------|-----------------------------------|-----------|-----------------|---------------|
| 99.59      | <i>Phytobacter diazotrophicus</i> | UAEU22    | 484/486         | CP051548      |
|            | <i>Metakosakonia</i> sp.          | MRY16-398 | 484/486         | AP018756      |
|            | <i>Phytobacter</i> sp.            | SCO41**   | 484/486         | CP027225      |
|            | <i>Phytobacter diazotrophicus</i> | DSM 17806 | 484/486         | KY288669      |
| 99.38      | <i>Phytobacter</i> sp.            | SCO41**   | 483/486         | KT192640      |
|            | <i>Citrobacter</i> sp.            | BDA59-3   | 483/486         | CP063427      |
|            | <i>Grimontella senegalensis</i>   | C1p       | 483/486         | AY217653      |
|            | <i>Yokenella</i> sp.              | UR 6-12   | 480/483         | KM253221      |
| 99.18      | <i>Phytobacter diazotrophicus</i> | BASG96    | 483/487         | MN647003      |
| 98.98      | <i>Phytobacter diazotrophicus</i> | 10289RM   | 483/488         | KY288670      |
|            | <i>Enterobacter</i> sp.           | 2357      | 483/488         | JX174234      |
| 98.97      | <i>Phytobacter diazotrophicus</i> | BLM01     | 481/486         | MK894154      |

\*BLAST search using the megablast algorithm was performed in 2020, and the results remained the same on March 1, 2023. Although the species of several strains such as *Metakosakonia* sp. MRY16-398 and *Citrobacter* sp. BDA59-3 were corrected later (1,2), those displayed in the NCBI-BLAST site are shown .

\*\* Two *Phytobacter* sp. SCO14 sequences exist in the database, and both were hit.

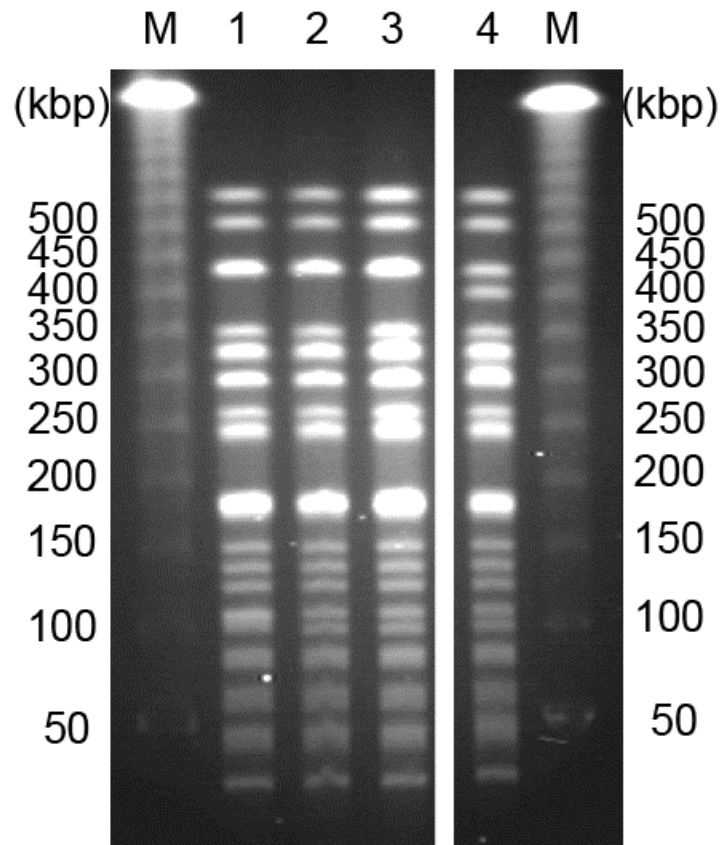

**Figure S1. Pulsed-field gel electrophoresis for four *P. diazotrophicus* isolates.**

DNA-plugs were digested by *Xba*I (New England Biolabs, Ipswich, MA, USA) and applied to electrophoresis using the CHEF mapper system (Bio-Rad, Hercules, CA, USA). In accordance with the Tenover criteria (3), these four isolates (1: TA9730, 2: TA9734, 3: TA9759, 4: TA9832) are indistinguishable. M represents a lambda DNA ladder marker (Promega, Madison, WI, USA)

### Supplementary References

1. Smits THM, Arend LNVS, Cardew S, Tang-Hallbäck E, Mira MT, Moore ERB, Sampaio JLM, Rezzonico F, Pillonetto M. 2022. Resolving taxonomic confusion: establishing the genus *Phytobacter* on the list of clinically relevant Enterobacteriaceae. *Eur J Clin Microbiol Infect Dis* 41:547–558.
2. Ma Y, Yao R, Li Y, Wu X, Li S, An Q. 2020. Proposal for unification of the genus *Metakosakonia* and the genus *Phytobacter* to a single genus *Phytobacter* and reclassification of *Metakosakonia massiliensis* as *Phytobacter massiliensis* comb. nov. *Curr Microbiol* 77:1945–1954.
3. Tenover FC, Arbeit RD, Goering RV, Mickelsen PA, Murray BE, Persing DH, Swaminathan B. 1995. Interpreting chromosomal DNA restriction patterns produced by pulsed-field gel electrophoresis: criteria for bacterial strain typing. *J Clin Microbiol.* 33:2233-2239.
